# Supplementary material for: Enhancing supercapacitive performance: integration of bio-mass-derived carbon into a CaMn3O6 nanocomposite
Source: Royal Society of Chemistry journal article supplement (doi:10.1039/d3nj04629j), 2023-01-01
Supplement: d3nj04629j1.pdf [file d3nj04629j1.pdf]

## Supplementary Information

### **Enhancing Supercapacitive Performance: Integration of Bio-mass Derived Carbon into $\text{CaMn}_3\text{O}_6$ Nanocomposite**

Palanisamy Rajkumar <sup>a</sup>, Vedyappan Thirumal <sup>a</sup>, Maalavika S. Iyer <sup>b</sup>, Karuppanan Aravinth <sup>b</sup>,  
Mozaffar Abdollahifar <sup>c</sup>, Kisoo Yoo <sup>a,\*</sup>, Jinho Kim <sup>a,\*</sup>

<sup>a</sup> Department of Mechanical Engineering, Yeungnam University, Gyeongsan-si, Gyeongbuk-do 38541, Republic of Korea.

<sup>b</sup> SSN Research Centre, Sri Sivasubramaniya Nadar College of Engineering, Kalavakkam, Chennai 603110, Tamil Nadu, India.

<sup>c</sup> Department of Materials Science, Faculty of Engineering, Kiel University, Kaiserstraße 2, D-24143 Kiel, Germany.

\*E-mail: [jinho@ynu.ac.kr](mailto:jinho@ynu.ac.kr) (JK); [kisoooyoo@yu.ac.kr](mailto:kisoooyoo@yu.ac.kr) (KY)

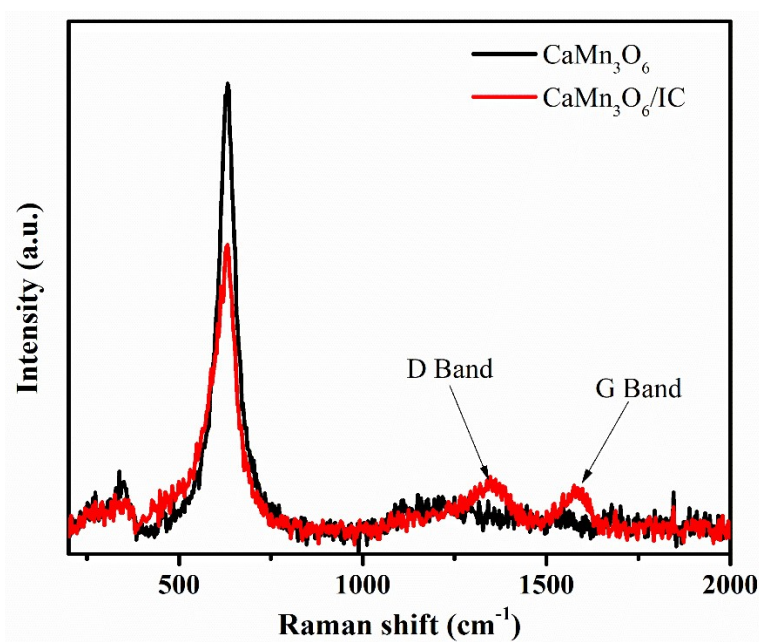

**Figure S1:** Raman spectra of  $\text{CaMn}_3\text{O}_6$  and  $\text{CaMn}_3\text{O}_6/\text{IC}$  composite.

Figure S1 shows the Raman spectra of  $\text{CaMn}_3\text{O}_6$  and  $\text{CaMn}_3\text{O}_6/\text{IC}$  with multiple peaks. The sharp and intense Raman peaks show the crystalline nature of  $\text{CaMn}_3\text{O}_6$  material. The intense peak at  $631\text{ cm}^{-1}$  shows the symmetric stretching of Mn – O bond [S16]. The Raman spectra of  $\text{CaMn}_3\text{O}_6/\text{IC}$  shows the obvious D and G bands at  $1350$  and  $1580\text{ cm}^{-1}$  apart from the stretching vibration observed for Mn – O bond. The Raman spectra confirms the formation of composite and crystallinity of the material.

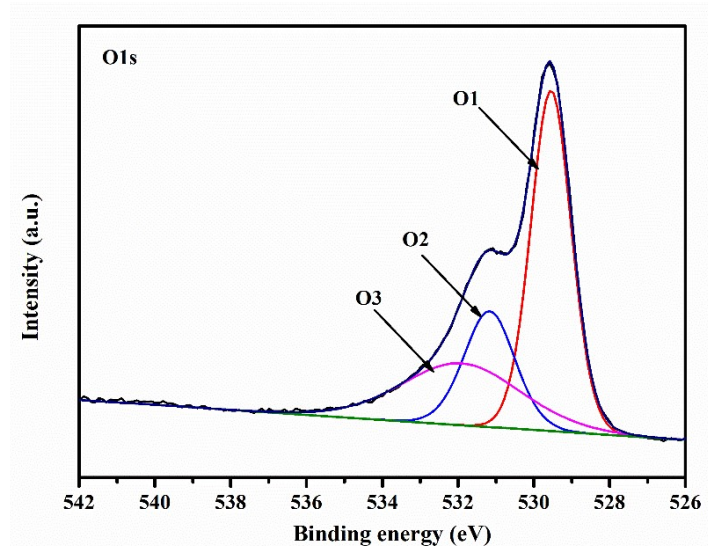

**Figure S2:** Deconvoluted spectra of O1s.

Figure S2 shows the deconvoluted spectra of O1s peak found in the survey spectra of  $\text{CaMn}_3\text{O}_6/\text{IC}$ . We can see peaks at 529, 532 and 533 eV which is labelled as O1, O2 and O3 respectively.

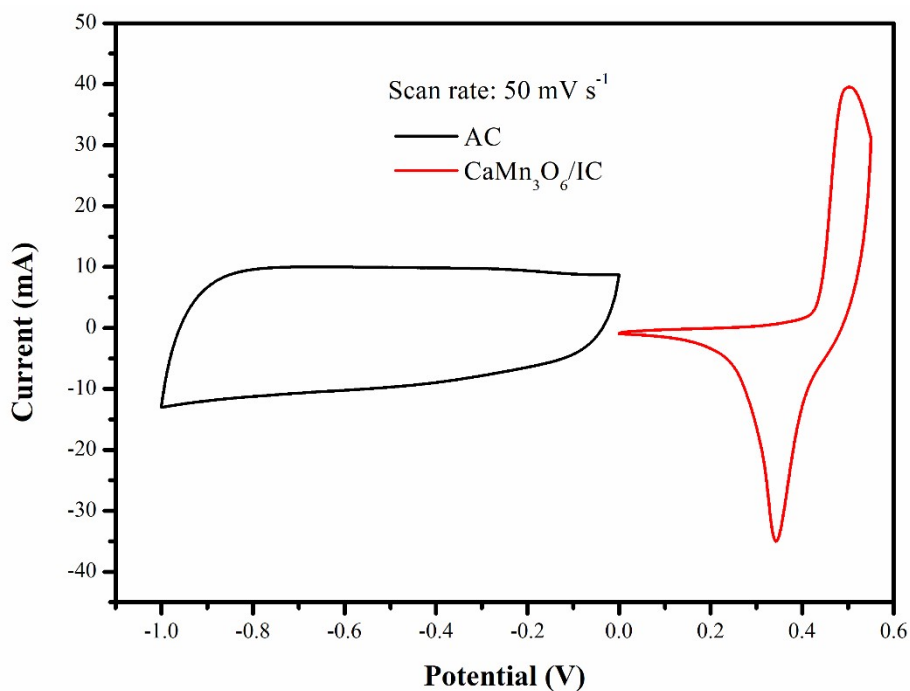

**Figure S3:** Comparison CV curve of Activated carbon and  $\text{CaMn}_3\text{O}_6/\text{IC}$  in the three-electrode system

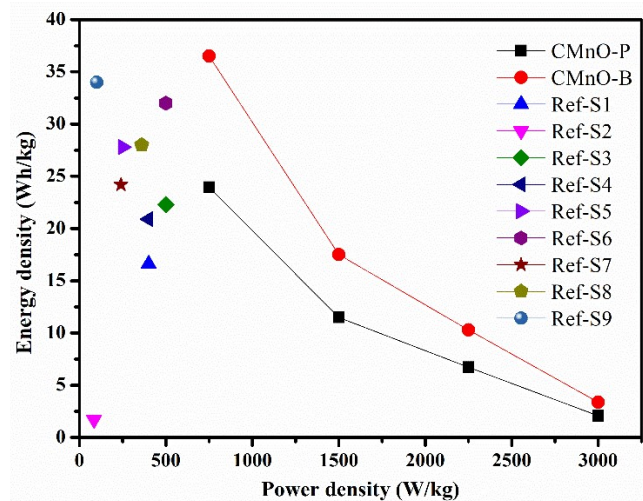

**Figure S4:** Ragone plot depicting Energy density Vs Power density.

The  $\text{CaMn}_3\text{O}_6 \parallel \text{AC}$  device delivers energy density of  $23.94 \text{ Wh kg}^{-1}$  at power density  $750 \text{ W kg}^{-1}$ . Whereas,  $\text{CaMn}_3\text{O}_6 \parallel \text{IC}$  delivered energy density of  $36.52 \text{ Wh kg}^{-1}$  at  $750 \text{ W kg}^{-1}$ .

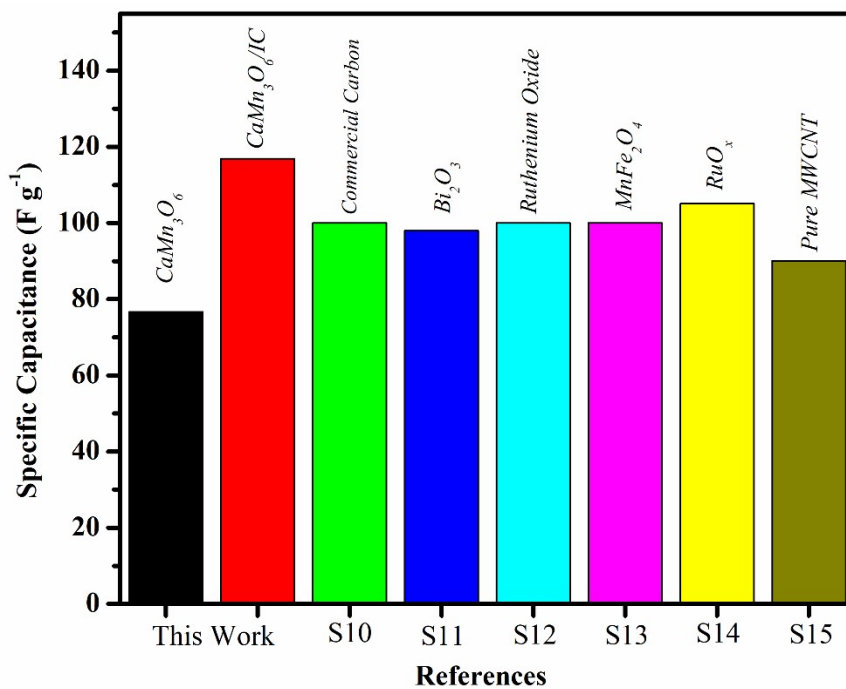

**Figure S5:** Bar diagram comparing  $C_{sp}$  of  $\text{CaMn}_3\text{O}_6$  based device with the literature.

## References:

- S1:** C.S. Liu, C.L. Huang, H.C. Fang, K.Y. Hung, C.A. Su, and Y.Y. Li, *J. Energy Storage*, 2021, 33, 102130.
- S2:** M. Shin, K.P. Sharma, K. Kim, G.P. Awasthi, and C. Yu, *J. Phys. Chem. Solids*, 2023, 177, 111310.
- S3:** C. Guo, H. Li, X. Zhang, H. Huo, and C. Xu, *Sens. Actuators B: Chem.*, 2015, 206, 407-414.
- S4:** G. Zhu, L. Deng, J. Wang, L. Kang, and Z.H. Liu, *Colloids Surf. A: Physicochem. Eng. Asp.*, 2013, 434, 42-48.
- S5:** K. Wu, Z. Ye, Y. Ding, Z. Zhu, X. Peng, D. Li, and G. Ma, *J. Power Sources*, 2020, 477, 229031.
- S6:** X. Wang, L. Chen, S. Zhang, X. Chen, Y. Li, J. Liu, F. Lu, and Y. Tang, *Colloids Surf. A: Physicochem. Eng. Asp.*, 2019, 573, 57-66.
- S7:** B. Wang, J. Qiu, H. Feng, N. Wang, E. Sakai, and T. Komiyama, *Electrochim. Acta*, 2016, 212, 710-721.
- S8:** X. Ji, D. Sun, W. Zou, Z. Wang, and D. Sun, *J. Alloys Compd.*, 2021, 876, p.160112.
- S9:** N. Mohammadi, K. Pourreza, N.B. Adeg, and M. Omidvar, *J. Alloys Compd.*, 2021, 883, 160874.
- S10:** P. Pande, P.G. Rasmussen, and L.T. Thompson, *J. Power Sources*, 2012, 207, 212-215.
- S11:** T.P. Gujar, V.R. Shinde, C.D. Lokhande, and S.H. Han, *J. Power Sources*, 2006, 161(2), 1479-1485.
- S12:** H.J. Bang, W. Lu, F. Cao, and J. Prakash, *Electrochem. Commun.*, 2000, 2(9), 653-657.
- S13:** T. Brousse, and D. Bélanger, *Electrochem. Solid-State Lett.*, 2003, 6(11), A244.
- S14:** C.C. Hu, Y.H. Huang, and K.H. Chang, *J. Power Sources*, 2002, 108(1-2), 117-127.
- S15:** J.H. Kim, Y.I. Ko, Y.A. Kim, K.S. Kim, and C.M. Yang, *J. Alloys Compd.*, 2021, 855, 157282.
- S16:** S.B. Mary, M. Francis, V.G. Sathe, V. Ganesan, and A.L. Rajesh, *Phys. B: Condens. Matter*, 2019, 575, 411707.
